# Supplementary material for: Circular RNA COL1A1 promotes Warburg effect and tumor growth in nasopharyngeal carcinoma
Source: Discov Oncol. 2024 Apr 15;15:120. doi: 10.1007/s12672-024-00941-1 (PMC11018599; doi:10.1007/s12672-024-00941-1)
Supplement: Supplementary file 1 — Additional file1 (XLSX 11 KB) [file 12672_2024_941_MOESM1_ESM.xlsx]

## Sheet: Sheet1
#please cite:
#Zhou KR, Liu S, Li B, Liu SR, Zheng WJ, Cai L, et al. An encyclopedia of RNA interactomes in ENCORI.
#Li JH, et al.starBase v2.0: decoding miRNA-ceRNA, miRNA-ncRNA and protein-RNA interaction networks from large-scale CLIP-Seq data , Nucleic Acids Res. 2014 Jan;42:D92-7.
#Please note that the genomic locous are in 1-base (not bed format)
miRNAid	miRNAname	geneID	geneName	geneType	chromosome	start	end	strand	clipExpNum	degraExpNum	RBP	merClass	miRseq	align	targetSeq	TDMDScore	phyloP
MIMAT0004987	hsa-miR-944	NM_000088	COL1A1	circRNA	chr17	50184156	50184177	-	6	0	AGO1-4,AGO2	7mer-m8	gaguaggcUACAUGUUAUUAAa	| :||||:|||||||	uuuuguauGUGUAUAAUAAUUu	0.8182	5.928
MIMAT0000444	hsa-miR-126-5p	NM_000088	COL1A1	circRNA	chr17	50184157	50184176	-	6	0	AGO1-4,AGO2	7mer-m8	gcGCAUGGUUUUCAUUAUUAc	:|||: : | |||||||	uuUGUAUGUGUA-UAAUAAUu	0.9745	6.016
MIMAT0004780	hsa-miR-532-3p	NM_000088	COL1A1	circRNA	chr17	50184199	50184219	-	5	1	AGO1-4,AGO2	7mer-m8	acguucGGAACCCACACCCUCc	| ||| ||| |||||||	uuucccCCUAGGG-GUGGGAGg	1.0092	1.937
MIMAT0003294	hsa-miR-625-5p	NM_000088	COL1A1	circRNA	chr17	50184211	50184232	-	4	0	AGO1-4,AGO2	7mer-m8	ccUGAUAUCUU-GAAAGGGGGa	| || | : |: :||||||||	gcACAAAGCAGUUUUUCCCCCu	1.1823	1.899
MIMAT0000275	hsa-miR-218-5p	NM_000088	COL1A1	circRNA	chr17	50184227	50184247	-	1	0	AGO1-4	8mer	uguaccaaucuagUUCGUGUu	| | | |||||||	agacaacuucccaAAGCACAa	0.4216	1.621
MIMAT0000737	hsa-miR-382-5p	NM_000088	COL1A1	circRNA	chr17	50184238	50184259	-	2	0	AGO1-4	7mer-m8	gcuuagguGGUGCUUGUUGAAg	| :|| :|||||||	cccggguuUCAGAGACAACUUc	0.3796	1.614
MIMAT0005877	hsa-miR-1286	NM_000088	COL1A1	circRNA	chr17	50184269	50184287	-	3	0	AGO1-4,AGO2	7mer-m8	ucccGAGUAGAACCAGGACGu	|| :||| |||||||	ccucCUAGUCU--GUCCUGCg	0.8559	0.362
MIMAT0018952	hsa-miR-4436a	NM_000088	COL1A1	circRNA	chr17	50184270	50184291	-	3	0	AGO1-4,AGO2	7mer-m8	uaGGUGAAGA-CGGACAGGACg	:| || || |:||||||||	gcUCCCUCCUAGUCUGUCCUGc	1.2496	0.503
MIMAT0021020	hsa-miR-5000-3p	NM_000088	COL1A1	circRNA	chr17	50184270	50184291	-	3	0	AGO1-4,AGO2	7mer-m8	agguucaagucuucACAGGACu	| | | |||||||	gcucccuccuagucUGUCCUGc	0.357	0.503
MIMAT0026483	hsa-miR-370-5p	NM_000088	COL1A1	circRNA	chr17	50186668	50186690	-	7	0	AGO1-4,AGO2	7mer-m8	cauuGACGU-CUCUGCACUGGAc	| ||| | ||||||||	ccgcCCGCACCUGCCGUGACCUc	0.7605	5.453
